# Supplementary material for: Alcohol Use Disorder Polygenic Score Compared With Family History and ADH1B
Source: PubMed Central journal article supplement (PMC11686414; doi:10.1001/jamanetworkopen.2024.52705), 2024-12-30
Supplement: jamanetwopen-e2452705-s003.pdf [file jamanetwopen-e2452705-s003.pdf]

## Data Sharing Statement

Lai. Alcohol Use Disorder Polygenic Score Compared With Family History and ADH1B. *JAMA Netw Open*. Published December 30, 2024. doi:10.1001/jamanetworkopen.2024.52705

### Data

**Data available:** No

### Additional Information

**Explanation for why data not available:** Individual patient data will not be shared due to data sharing policy. All results will be shared.
